# Supplementary material for: Odontometric analysis of permanent mandibular first and second premolars in an Indian population using cone beam computed tomography
Source: PeerJ. 2025 Sep 26;13:e20039. doi: 10.7717/peerj.20039 (PMC12478308; doi:10.7717/peerj.20039)
Supplement: Supplemental Information 2 — 1- male and 2- female [file peerj-13-20039-s002.xlsx]

## Sheet: Sheet1
		Mandibular Second Premolar			Mandibular First Premolar
Gender	Age	Crown length	Root length	Total Length	Crown length	Root Length	Total Length
2	29	6.6	13.6	20.2	6.3	13.8	20.1
1	41	6.7	15.3	22	6.3	15.5	21.8
1	64	5.4	15.5	20.9	5.8	13.9	19.7			Gender
1	57	6	14	20	5.9	14.2	20.1			1 - Male
1	48	7	12.5	19.5	7.2	12.7	19.9			2 - Female
2	42	6.3	13.4	19.7	5.8	13.9	19.7
1	48	7	11.8	18.8	7.5	11	18.5
2	55	5.9	13.4	19.3	6.4	12.9	19.3
1	22	7.2	12.2	19.4	7.1	12.7	19.8
1	41	5.9	12.6	18.5	6	12.9	18.9
1	44	6.8	12.1	18.9	5.2	13.5	18.7
2	32	6.9	13	19.9	6.4	14.1	20.5
1	32	6.7	11.8	18.5	4.3	14	18.3
1	55	6.5	11.5	18	4.3	13.8	18.1
1	36	6.2	11.8	18	7.5	10.4	17.9
2	45	7.5	12.2	19.7	6	14.2	20.2
1	36	7.6	14.2	21.8	7	14.9	21.9
1	57	6.5	14.3	20.8	5.3	15.1	20.4
2	23	6	13.5	19.5	4.4	14.6	19
2	51	5.4	15	20.4	5.6	15.1	20.7
2	30	5.4	14	19.4	5.4	13.8	19.2
1	47	6.5	13	19.5	6.7	13.1	19.8
1	31	6.5	13.5	20	6.2	13.9	20.1
1	54	5.9	14.2	20.1	6.3	14.2	20.5
1	57	6.7	14.1	20.8	6.5	14.6	21.1
1	47	7.3	13.1	20.4	7.4	13.2	20.6
2	28	5.5	12.5	18	5.2	12.9	18.1
1	23	7	12.7	19.7	7.5	12.4	19.9
2	59	7	11.9	18.9	6.8	11.8	18.6
2	57	7.5	13.1	20.6	7.5	13.1	20.6
2	28	6	14.8	20.8	5.9	14.5	20.4
2	40	7.5	12.9	20.4	7.1	13.7	20.8
1	30	5.6	12.4	18	6.2	14.9	21.1
2	56	7.9	11.8	19.7	5.9	13.1	19
2	24	7.2	11.1	18.3	5.6	12.9	18.5
1	55	7.3	12.6	19.9	7.5	12.4	19.9
2	45	6.6	13.1	19.7	5.7	14.8	20.5
2	39	6.1	14	20.1	6	15.1	21.1
1	42	7.8	12.9	20.7	7.4	13.2	20.6
1	58	7.8	12.1	19.9	7.9	11.8	19.7
2	32	7.5	12.2	19.7	7.1	13	20.1
2	45	5.6	14.6	20.2	8.1	11.8	19.9
1	22	6.4	12.9	19.3	7.5	12.2	19.7
2	39	6.1	12	18.1	6.4	12.5	18.9
2	58	7	11.5	18.5	6.9	11.8	18.7
2	42	6.6	13.5	20.1	7.3	13.2	20.5
2	51	6.3	12.4	18.7	5.8	12.5	18.3
1	27	5.9	12.4	18.3	5.5	12.6	18.1
2	49	5.9	12.6	18.5	6.8	11.1	17.9
1	58	6.5	14	20.5	6	14.2	20.2
1	37	7	13.8	20.8	5.9	14.6	20.5
2	22	6.6	13.9	20.5	6.2	14.9	21.1
2	46	7.6	11	18.6	5.2	13.1	18.3
1	48	5.7	12.8	18.5	5.3	12.8	18.1
2	58	6.6	11.2	17.8	6.9	11	17.9
2	45	6.4	12.2	18.6	6.9	11.8	18.7
1	22	7.2	13.6	20.8	7.3	13.2	20.5
1	39	5.4	15.3	20.7	5.8	12.5	18.3
1	58	5.4	10.9	16.3	5.5	12.6	18.1
2	42	6	14.4	20.4	5.3	12.8	18.1
1	51	6.2	12.3	18.5	6.9	11	17.9
1	27	5.9	13.9	19.8	6.9	11.8	18.7
1	49	6.4	15	21.4	7.3	13.2	20.5
2	23	5.8	13.8	19.6	5.8	12.5	18.3
1	59	4.8	13.3	18.1	7.5	11	18.5
1	57	4.7	15.5	20.2	6.4	12.9	19.3
2	28	5.7	14.6	20.3	7.1	12.7	19.8
2	40	4.4	13.2	17.6	6	12.9	18.9
2	30	6.8	15.5	22.3	5.2	13.5	18.7
1	56	5.2	14.8	20	6.4	14.1	20.5
1	24	5.4	17.5	22.9	4.3	14	18.3
1	55	5.7	14.9	20.6	6.9	11.8	18.7
1	45	6.8	14.7	21.5	7.3	13.2	20.5
1	39	4.7	14.2	18.9	5.8	12.5	18.3
2	42	5.2	15.8	21	7.5	11	18.5
1	58	4.7	14.8	19.5	6.4	12.9	19.3
2	32	6.5	14.4	20.9	7.1	12.7	19.8
2	45	5.7	15.4	21.1	7.5	12.2	19.7
2	22	6.9	13.9	20.8	6.4	12.5	18.9
1	24	6.7	16.7	23.4	6.9	11.8	18.7
1	55	5.7	12.8	18.5	7.3	13.2	20.5
2	45	4.7	13.6	18.3	5.8	12.5	18.3
1	39	4.5	13.9	18.4	5.5	12.6	18.1
1	42	4.9	15.3	20.2	6.8	11.1	17.9
2	44	5.1	14.6	19.7	6	14.2	20.2
2	32	5.3	17.8	23.1	5.9	14.6	20.5
2	32	6.1	14.1	20.2	6.2	14.9	21.1
1	55	5.1	16.6	21.7	5.2	13.1	18.3
1	36	5.3	16.8	22.1	5.3	12.8	18.1
1	45	5.3	14.2	19.5	6.9	11	17.9
1	36	6.4	15.2	21.6	6.9	11.8	18.7
1	57	6.4	15.8	22.2	7.3	13.2	20.5
2	23	5.5	13.2	18.7	5.8	12.5	18.3
1	51	5.3	13.5	18.8	5.5	12.6	18.1
2	30	5.6	14.1	19.7	5.3	12.8	18.1
2	47	5.9	12.6	18.5	6.9	11	17.9
2	45	5.6	16.5	22.1	6.9	11.8	18.7
1	39	5.4	14.9	20.3	5.8	12.5	18.3
1	47	4.7	12.1	16.8	5.5	12.6	18.1
2	45	4.7	17	21.7	5.3	12.8	18.1
2	40	7.5	12.9	20.4	7.1	13.7	20.8
2	30	5.6	12.4	18	6.2	14.9	21.1
1	56	7.9	11.8	19.7	5.9	13.1	19
1	24	7.2	11.1	18.3	5.6	12.9	18.5
1	55	7.3	12.6	19.9	7.5	12.4	19.9
1	45	6.6	13.1	19.7	5.7	14.8	20.5
1	39	6.1	14	20.1	6	15.1	21.1
2	42	7.8	12.9	20.7	7.4	13.2	20.6
1	58	7.8	12.1	19.9	7.9	11.8	19.7
2	32	7.5	12.2	19.7	7.1	13	20.1
2	30	6.8	15.5	22.3	5.2	13.5	18.7
2	56	5.2	14.8	20	6.4	14.1	20.5
2	24	5.4	17.5	22.9	4.3	14	18.3
1	55	5.7	14.9	20.6	6.9	11.8	18.7
1	45	6.8	14.7	21.5	7.3	13.2	20.5
1	39	4.7	14.2	18.9	5.8	12.5	18.3
1	42	5.2	15.8	21	7.5	11	18.5
2	58	4.7	14.8	19.5	6.4	12.9	19.3
1	32	6.5	14.4	20.9	7.1	12.7	19.8
2	45	5.7	15.4	21.1	7.5	12.2	19.7
1	22	6.9	13.9	20.8	6.4	12.5	18.9
1	39	6.1	12	18.1	6.4	12.5	18.9
1	58	7	11.5	18.5	6.9	11.8	18.7
2	42	6.6	13.5	20.1	7.3	13.2	20.5
1	51	6.3	12.4	18.7	5.8	12.5	18.3
1	27	5.9	12.4	18.3	5.5	12.6	18.1
1	49	5.9	12.6	18.5	6.8	11.1	17.9
2	58	6.5	14	20.5	6	14.2	20.2
1	37	7	13.8	20.8	5.9	14.6	20.5
1	22	6.6	13.9	20.5	6.2	14.9	21.1
2	46	7.6	11	18.6	5.2	13.1	18.3
2	48	5.7	12.8	18.5	5.3	12.8	18.1
2	58	4.7	14.8	19.5	6.4	12.9	19.3
1	32	6.5	14.4	20.9	7.1	12.7	19.8
1	45	5.7	15.4	21.1	7.5	12.2	19.7
1	22	6.9	13.9	20.8	6.4	12.5	18.9
1	39	6.1	12	18.1	6.4	12.5	18.9
1	58	7	11.5	18.5	6.9	11.8	18.7
2	42	6.6	13.5	20.1	7.3	13.2	20.5
1	51	6.3	12.4	18.7	5.8	12.5	18.3
2	27	5.9	12.4	18.3	5.5	12.6	18.1
2	27	5.9	12.4	18.3	5.5	12.6	18.1
2	49	5.9	12.6	18.5	6.8	11.1	17.9
2	58	6.5	14	20.5	6	14.2	20.2
1	37	7	13.8	20.8	5.9	14.6	20.5
2	22	6.6	13.9	20.5	6.2	14.9	21.1
2	46	7.6	11	18.6	5.2	13.1	18.3
1	48	5.7	12.8	18.5	5.3	12.8	18.1
2	58	4.7	14.8	19.5	6.4	12.9	19.3
2	32	6.5	14.4	20.9	7.1	12.7	19.8
1	45	5.7	15.4	21.1	7.5	12.2	19.7
1	22	6.9	13.9	20.8	6.4	12.5	18.9
2	39	6.1	12	18.1	6.4	12.5	18.9
2	58	7	11.5	18.5	6.9	11.8	18.7
1	22	6.6	13.9	20.5	6.2	14.9	21.1
2	46	7.6	11	18.6	5.2	13.1	18.3
2	48	5.7	12.8	18.5	5.3	12.8	18.1
2	58	4.7	14.8	19.5	6.4	12.9	19.3
2	32	6.5	14.4	20.9	7.1	12.7	19.8
1	45	5.7	15.4	21.1	7.5	12.2	19.7
2	22	6.9	13.9	20.8	6.4	12.5	18.9
1	39	6.1	12	18.1	6.4	12.5	18.9
1	58	7	11.5	18.5	6.9	11.8	18.7
2	42	6.6	13.5	20.1	7.3	13.2	20.5
2	51	6.3	12.4	18.7	5.8	12.5	18.3
1	27	5.9	12.4	18.3	5.5	12.6	18.1
2	27	5.9	12.4	18.3	5.5	12.6	18.1
2	49	5.9	12.6	18.5	6.8	11.1	17.9
1	58	6.5	14	20.5	6	14.2	20.2
1	37	7	13.8	20.8	5.9	14.6	20.5
1	22	6.6	13.9	20.5	6.2	14.9	21.1
2	46	7.6	11	18.6	5.2	13.1	18.3
1	48	5.7	12.8	18.5	5.3	12.8	18.1
1	58	4.7	14.8	19.5	6.4	12.9	19.3
1	32	6.5	14.4	20.9	7.1	12.7	19.8
2	45	5.7	15.4	21.1	7.5	12.2	19.7
1	22	6.9	13.9	20.8	6.4	12.5	18.9
1	22	6.6	13.9	20.5	6.2	14.9	21.1
2	46	7.6	11	18.6	5.2	13.1	18.3
2	48	5.7	12.8	18.5	5.3	12.8	18.1
2	58	4.7	14.8	19.5	6.4	12.9	19.3
1	32	6.5	14.4	20.9	7.1	12.7	19.8
1	45	5.7	15.4	21.1	7.5	12.2	19.7
1	22	6.9	13.9	20.8	6.4	12.5	18.9
1	39	6.1	12	18.1	6.4	12.5	18.9
1	58	7	11.5	18.5	6.9	11.8	18.7
2	22	6.6	13.9	20.5	6.2	14.9	21.1
1	46	7.6	11	18.6	5.2	13.1	18.3
2	48	5.7	12.8	18.5	5.3	12.8	18.1
2	58	4.7	14.8	19.5	6.4	12.9	19.3
2	32	6.5	14.4	20.9	7.1	12.7	19.8
1	45	5.7	15.4	21.1	7.5	12.2	19.7
1	22	6.9	13.9	20.8	6.4	12.5	18.9
2	39	6.1	12	18.1	6.4	12.5	18.9
1	58	7	11.5	18.5	6.9	11.8	18.7
1	42	6.6	13.5	20.1	7.3	13.2	20.5
2	51	6.3	12.4	18.7	5.8	12.5	18.3
2	58	7	11.5	18.5	6.9	11.8	18.7
2	42	6.6	13.5	20.1	7.3	13.2	20.5
1	51	6.3	12.4	18.7	5.8	12.5	18.3
1	27	5.9	12.4	18.3	5.5	12.6	18.1
1	27	5.9	12.4	18.3	5.5	12.6	18.1
1	49	5.9	12.6	18.5	6.8	11.1	17.9
1	58	6.5	14	20.5	6	14.2	20.2
2	37	7	13.8	20.8	5.9	14.6	20.5
1	22	6.6	13.9	20.5	6.2	14.9	21.1
1	46	7.6	11	18.6	5.2	13.1	18.3
2	48	5.7	12.8	18.5	5.3	12.8	18.1
2	58	4.7	14.8	19.5	6.4	12.9	19.3
2	32	6.5	14.4	20.9	7.1	12.7	19.8
1	45	5.7	15.4	21.1	7.5	12.2	19.7
1	22	6.9	13.9	20.8	6.4	12.5	18.9
1	22	6.6	13.9	20.5	6.2	14.9	21.1
1	46	7.6	11	18.6	5.2	13.1	18.3
1	48	5.7	12.8	18.5	5.3	12.8	18.1
2	58	4.7	14.8	19.5	6.4	12.9	19.3
1	32	6.5	14.4	20.9	7.1	12.7	19.8
2	45	5.7	15.4	21.1	7.5	12.2	19.7
2	22	6.9	13.9	20.8	6.4	12.5	18.9
2	39	6.1	12	18.1	6.4	12.5	18.9
2	58	7	11.5	18.5	6.9	11.8	18.7
1	39	6.1	12	18.1	6.4	12.5	18.9
1	58	7	11.5	18.5	6.9	11.8	18.7
1	42	6.6	13.5	20.1	7.3	13.2	20.5
1	51	6.3	12.4	18.7	5.8	12.5	18.3
2	58	7	11.5	18.5	6.9	11.8	18.7
1	42	6.6	13.5	20.1	7.3	13.2	20.5
2	51	6.3	12.4	18.7	5.8	12.5	18.3
1	27	5.9	12.4	18.3	5.5	12.6	18.1
1	27	5.9	12.4	18.3	5.5	12.6	18.1
2	49	5.9	12.6	18.5	6.8	11.1	17.9
1	58	6.5	14	20.5	6	14.2	20.2
1	37	7	13.8	20.8	5.9	14.6	20.5
1	22	6.6	13.9	20.5	6.2	14.9	21.1
1	46	7.6	11	18.6	5.2	13.1	18.3
1	48	5.7	12.8	18.5	5.3	12.8	18.1
2	37	7	13.8	20.8	5.9	14.6	20.5
1	22	6.6	13.9	20.5	6.2	14.9	21.1
1	46	7.6	11	18.6	5.2	13.1	18.3
2	48	5.7	12.8	18.5	5.3	12.8	18.1
2	58	4.7	14.8	19.5	6.4	12.9	19.3
2	32	6.5	14.4	20.9	7.1	12.7	19.8
1	45	5.7	15.4	21.1	7.5	12.2	19.7
1	22	6.9	13.9	20.8	6.4	12.5	18.9
1	22	6.6	13.9	20.5	6.2	14.9	21.1
1	46	7.6	11	18.6	5.2	13.1	18.3
1	48	5.7	12.8	18.5	5.3	12.8	18.1
2	58	4.7	14.8	19.5	6.4	12.9	19.3
1	32	6.5	14.4	20.9	7.1	12.7	19.8
2	45	5.7	15.4	21.1	7.5	12.2	19.7
2	22	6.9	13.9	20.8	6.4	12.5	18.9
1	39	6.1	12	18.1	6.4	12.5	18.9
1	58	7	11.5	18.5	6.9	11.8	18.7
1	39	6.1	12	18.1	6.4	12.5	18.9
2	58	7	11.5	18.5	6.9	11.8	18.7
1	42	6.6	13.5	20.1	7.3	13.2	20.5
2	51	6.3	12.4	18.7	5.8	12.5	18.3
1	58	7	11.5	18.5	6.9	11.8	18.7
1	42	6.6	13.5	20.1	7.3	13.2	20.5
2	51	6.3	12.4	18.7	5.8	12.5	18.3
1	27	5.9	12.4	18.3	5.5	12.6	18.1
1	27	5.9	12.4	18.3	5.5	12.6	18.1
1	49	5.9	12.6	18.5	6.8	11.1	17.9
1	58	6.5	14	20.5	6	14.2	20.2
1	51	6.3	12.4	18.7	5.8	12.5	18.3
2	58	7	11.5	18.5	6.9	11.8	18.7
1	42	6.6	13.5	20.1	7.3	13.2	20.5
1	51	6.3	12.4	18.7	5.8	12.5	18.3
2	27	5.9	12.4	18.3	5.5	12.6	18.1
2	27	5.9	12.4	18.3	5.5	12.6	18.1
2	49	5.9	12.6	18.5	6.8	11.1	17.9
1	58	6.5	14	20.5	6	14.2	20.2
1	37	7	13.8	20.8	5.9	14.6	20.5
1	22	6.6	13.9	20.5	6.2	14.9	21.1
1	46	7.6	11	18.6	5.2	13.1	18.3
1	48	5.7	12.8	18.5	5.3	12.8	18.1
2	37	7	13.8	20.8	5.9	14.6	20.5
1	22	6.6	13.9	20.5	6.2	14.9	21.1
2	46	7.6	11	18.6	5.2	13.1	18.3
1	48	5.7	12.8	18.5	5.3	12.8	18.1
1	58	4.7	14.8	19.5	6.4	12.9	19.3
1	46	7.6	11	18.6	5.2	13.1	18.3
1	48	5.7	12.8	18.5	5.3	12.8	18.1
1	58	4.7	14.8	19.5	6.4	12.9	19.3
2	32	6.5	14.4	20.9	7.1	12.7	19.8
1	45	5.7	15.4	21.1	7.5	12.2	19.7
2	22	6.9	13.9	20.8	6.4	12.5	18.9
1	39	6.1	12	18.1	6.4	12.5	18.9
2	58	7	11.5	18.5	6.9	11.8	18.7
2	42	6.6	13.5	20.1	7.3	13.2	20.5
1	51	6.3	12.4	18.7	5.8	12.5	18.3
2	27	5.9	12.4	18.3	5.5	12.6	18.1
2	27	5.9	12.4	18.3	5.5	12.6	18.1
1	49	5.9	12.6	18.5	6.8	11.1	17.9
1	58	6.5	14	20.5	6	14.2	20.2
1	37	7	13.8	20.8	5.9	14.6	20.5
2	22	6.6	13.9	20.5	6.2	14.9	21.1
1	46	7.6	11	18.6	5.2	13.1	18.3
1	48	5.7	12.8	18.5	5.3	12.8	18.1
1	58	4.7	14.8	19.5	6.4	12.9	19.3
